# Supplementary material for: Assessment of Diagnostic Outcomes of RNA Genetic Testing for Hereditary Cancer
Source: PubMed Central journal article supplement — JAMA Netw Open. 2019 Oct 23;2(10):e1913900. doi: 10.1001/jamanetworkopen.2019.13900 (PMC6820040; doi:10.1001/jamanetworkopen.2019.13900), 2019-10-23
Supplement: jamanetwopen-2-e1913900-s001.pdf [file jamanetwopen-2-e1913900-s001.pdf]

## Supplementary Online Content

Karam R, Conner B, LaDuca H, et al. Assessment of diagnostic outcomes of RNA genetic testing for hereditary cancer. *JAMA Netw Open*. 2019;2(10):e1913900.  
doi:10.1001/jamanetworkopen.2019.13900

**eMethods.** RNA Clinical Management Survey

**eTable.** Summary of Variants Analyzed by RGT

This supplementary material has been provided by the authors to give readers additional information about their work.

**eMethods.** RNA Clinical Management Survey

Q1 Please select the response which describes the type of variant reclassification that occurred:

- Downgraded from VUS to Benign/Likely Benign
- Upgraded from VUS to Pathogenic/Likely Pathogenic
- Downgraded from Pathogenic/Likely Pathogenic to VUS

Q2 Did the reclassification change your **medical management** recommendations for the patient?

- Yes
- No (If no, skip to Q5)

Q3 Which of the following best describes the change in your **medical management** recommendations for the patient?

- Recommended **increased** cancer screening and/or risk-reducing interventions
- Recommended **decreased** cancer screening and/or recommended **against** risk-reducing interventions

Q4 Please provide details regarding how your recommendations for cancer screening and/or risk-reducing interventions changed for the patient:

---

---

---

---

---

Q5 Did the reclassification change your **medical management** recommendations for the patient's family members?

- Yes
- No (If no, skip to Q8)

Q6 Which of the following best describes the change in your **medical management** recommendations for the patient's family members?

- Recommended **increased** cancer screening and/or risk-reducing interventions
- Recommended **decreased** cancer screening and/or recommended against risk-reducing interventions

Q7 Please provide details regarding how your recommendations for cancer screening and/or risk-reducing interventions changed for the patient's family members:

---

---

---

---

---

Q8 Did the reclassification change your **genetic testing** recommendations for the patient's family members?

- Yes
- No (If no, skip to Q10)

Q9 Which of the following describes the change in your **genetic testing** recommendations for the patient's family members?

- Recommended genetic testing for patient's family members for reclassified variant
- Recommended **against** genetic testing for patient's family members for reclassified variant
- Other (please describe): \_\_\_\_\_

Q10 Please use this space to provide any additional comments regarding the impact of reclassification on the patient and his/her family:

---

---

---

---

---

Q11 Thank you for completing the survey. Would you like to enter a raffle for the chance to win a gift card?

- Yes
- No

eTable. Summary of Variants Analyzed by RGT

| DNA Variant                      | RNA Evidence                      | Splicing in silico            | Assertion Before RGT | Final Assertion  | Evidence (ACMG/AMP Codes)                                                                                                                                                                                               | Clinically Actionable Reclassification | Total Patients impacted to date |
|----------------------------------|-----------------------------------|-------------------------------|----------------------|------------------|-------------------------------------------------------------------------------------------------------------------------------------------------------------------------------------------------------------------------|----------------------------------------|---------------------------------|
| ATM c.73-3C>G                    | r.73_79del7                       | Deleterious (TP)              | VUS                  | LP               | RNA studies demonstrate abnormal splicing (PS3)<br>Absent from population controls (Absent from population controls (PM2)<br><i>in silico</i> splicing models predict weakening of the native site (PP3)                | y                                      | 2                               |
| ATM c.8850+5A>C                  | WT                                | Benign (TN)                   | VUS                  | LB               | RNA studies demonstrate no abnormal splicing (BS3)<br><i>in silico</i> splicing models predict no effect on the native site (BP4)                                                                                       |                                        | 1                               |
| BRCA1 c.80+5G>A                  | r.-19_80del100;<br>r.-25_80del105 | Deleterious (TP)              | VUS                  | LP               | RNA studies demonstrate abnormal splicing (PS3)<br>Co-segregation with disease (PP1_Moderate)<br>Absent from population controls (PM2)<br><i>in silico</i> splicing models predict a weakening of the native site (PP3) | y                                      | 2                               |
| BRCA1 c.594-2A>C; BRCA1 c.641A>G | r.548_670del123 (AS)              | Deleterious (TP) <sup>1</sup> | VUS                  | LB               | RNA studies demonstrate no abnormal splicing (BS3)<br>Observed in healthy individuals (BS2)<br><i>in silico</i> splicing models predict a weakening of the native site (PP3)                                            |                                        | 32                              |
| BRCA1 c.670+1G>T                 | r.548_670del123 (AS)              | Deleterious (TP)              | LP                   | VUS              | RNA studies demonstrate no abnormal splicing (BS3)<br><i>in silico</i> splicing models predict a weakening of the native site (PP3)                                                                                     | y                                      | 6                               |
| BRCA1 c.3758C>G (p.S1253C)       | WT                                | Deleterious (FP)              | VUS                  | VUS <sup>2</sup> | RNA studies demonstrate no abnormal splicing (BS3) (splice)                                                                                                                                                             |                                        | n/a                             |

|                              |                                     |                  |     |                 |                                                                                                                                                                                                                                                          |   |    |
|------------------------------|-------------------------------------|------------------|-----|-----------------|----------------------------------------------------------------------------------------------------------------------------------------------------------------------------------------------------------------------------------------------------------|---|----|
|                              |                                     |                  |     |                 | <i>in silico</i> splicing models predict a weakening of the native site (PP3) (splice)                                                                                                                                                                   |   |    |
| BRCA1 c.4357+4T>C            | WT                                  | Benign (TN)      | VUS | LB              | RNA studies demonstrate no abnormal splicing (BS3)<br><i>in silico</i> splicing models predict no effect on the native site (BP4)<br>Absent from population controls (PM2)                                                                               |   | 1  |
| BRCA1 c.5072C>A (p.T1691K)   | WT                                  | Benign (TN)      | VUS | LP <sup>3</sup> | RNA studies demonstrate abnormal splicing (PS3)<br>Located in a mutational hotspot (PM1)<br>Absent from population controls (PM2)<br><i>in silico</i> splicing models predict a weakening of the native site (PP3)                                       | y | 3  |
| BRCA1 c.5152+5G>T            | r.5075_5152del78                    | Deleterious (TP) | VUS | LP              | RNA studies demonstrate abnormal splicing (PS3)<br>Novel missense change where a different missense change is pathogenic (PM5)<br>Absent from population controls (PM2)<br><i>in silico</i> splicing models predict a weakening of the native site (PP3) | y | 2  |
| BRCA1 c.5193G>A (p.E1731E)   | WT                                  | Benign (TN)      | VUS | LB              | RNA studies demonstrate no abnormal splicing (BS3)<br><i>in silico</i> splicing models predict no effect on the native site (BP4)                                                                                                                        |   | 4  |
| BRCA1 c.5332G>A (p.D1778N)   | r.5278_5332del55                    | Deleterious (TP) | VUS | LP              | RNA studies demonstrate abnormal splicing (PS3)<br>Co-segregation with disease (PP1_Moderate)<br>Absent from population controls (PM2)<br><i>in silico</i> splicing models predict a weakening of the native site (PP3)                                  | y | 11 |
| BRCA2 c.426-12_426-8delGTTTT | r.426_475del150                     | Deleterious (TP) | VUS | LP              | RNA studies demonstrate abnormal splicing (PS3)<br>Absent from population controls (PM2)<br><i>in silico</i> splicing models predict a weakening of the native site (PP3)                                                                                | y | 3  |
| BRCA2 c.681+2dupT            | r.632_681del150;<br>r.517_681del165 | Deleterious (TP) | VUS | LP              | RNA studies demonstrate abnormal splicing (PS3)<br>Absent from population controls (PM2)<br><i>in silico</i> splicing models predict a weakening of the native site (PP3)                                                                                | y | 4  |

|                           |                       |                  |     |     |                                                                                                                                                                                                                                                          |   |     |
|---------------------------|-----------------------|------------------|-----|-----|----------------------------------------------------------------------------------------------------------------------------------------------------------------------------------------------------------------------------------------------------------|---|-----|
| BRCA2 c.681+5G>C          | r.632_681del50        | Deleterious (TP) | VUS | VUS | RNA studies demonstrate abnormal splicing (PS3)_moderate<br>Absent from population controls (PM2)<br><i>in silico</i> splicing models predict a weakening of the native site (PP3)                                                                       |   | n/a |
| BRCA2 c.8754+4A>T         | r.8754+1_8754+47ins47 | Deleterious (TP) | VUS | LP  | RNA studies demonstrate abnormal splicing (PS3)<br>Novel missense change where a different missense change is pathogenic (PM5)<br>Absent from population controls (PM2)<br><i>in silico</i> splicing models predict a weakening of the native site (PP3) | y | 7   |
| BRCA2 c.9501+3A>T         | WT                    | Deleterious (FP) | VUS | LB  | RNA studies demonstrate no abnormal splicing (BS3)<br>Observed in trans with a pathogenic mutation in an individual without biallelic disease (BP2) <sup>4</sup><br><i>in silico</i> splicing models predict a weakening of the native site (PP3)        |   | 84  |
| BRIP1 c.2492+2dupT        | r.2493_2575del83      | Deleterious (TP) | LP  | LP  | RNA studies demonstrate abnormal splicing (PS3)<br>Observed in trans with a pathogenic variant in an individual with biallelic disease (PM3)<br><i>in silico</i> splicing models predict a weakening of the native site (PP3)                            |   | 7   |
| PALB2 c.211+4A>G          | WT                    | Deleterious (FP) | VUS | LB  | RNA studies demonstrate no abnormal splicing (BS3)<br>Absent from population controls (PM2)<br><i>in silico</i> splicing models predict a weakening of the native site (PP3)                                                                             |   | 1   |
| PALB2 c.2379C>T (p.G793G) | WT                    | Deleterious (FP) | VUS | LB  | RNA studies demonstrate no abnormal splicing (BS3)<br><i>in silico</i> splicing models predict a weakening of the native site (PP3)                                                                                                                      |   | 56  |
| PALB2 c.2559C>T (p.G853G) | r.2558_2586del29      | Deleterious (TP) | VUS | LP  | RNA studies demonstrate abnormal splicing (PS3)<br><i>in silico</i> splicing models predict a weakening of the native site (PP3)                                                                                                                         | y | 6   |
| PALB2 c.3113+5G>C         | r.3083_3113del31      | Deleterious (TP) | LP  | LP  | RNA studies demonstrate abnormal splicing (PS3)<br>Observed in trans with a pathogenic variant in an individual with biallelic disease (PM3)                                                                                                             |   | n/a |

|                           |                   |                  |     |    |                                                                                                                                                                                                                                                          |   |    |
|---------------------------|-------------------|------------------|-----|----|----------------------------------------------------------------------------------------------------------------------------------------------------------------------------------------------------------------------------------------------------------|---|----|
|                           |                   |                  |     |    | Absent from population controls (PM2)<br><i>in silico</i> splicing models predict a weakening of the native site (PP3)                                                                                                                                   |   |    |
| PALB2 c.3350+4A>C         | r.3202_3350del149 | Deleterious (TP) | VUS | LP | RNA studies demonstrate abnormal splicing (PS3)<br>Novel missense change where a different missense change is pathogenic (PM5)<br>Absent from population controls (PM2)<br><i>in silico</i> splicing models predict a weakening of the native site (PP3) | y | 3  |
| PALB2 c.3350+5G>A         | r.3202_3350del149 | Deleterious (TP) | VUS | LP | RNA studies demonstrate abnormal splicing (PS3)<br><i>in silico</i> splicing models predict a weakening of the native site (PP3)                                                                                                                         | y | 9  |
| RAD50 c.214-5C>T          | WT                | Benign (TN)      | VUS | LB | RNA studies demonstrate no abnormal splicing (BS3)<br><i>in silico</i> splicing models predict no effect on the native site (BP4)                                                                                                                        |   | 4  |
| RAD50 c.2524+4A>T         | WT                | Deleterious (FP) | VUS | LB | RNA studies demonstrate no abnormal splicing (BS3)<br><i>in silico</i> splicing models predict a weakening of the native site (PP3)                                                                                                                      |   | 5  |
| RAD50 c.2829+5G>C         | r.2734_2829del96  | Deleterious (TP) | VUS | LP | RNA studies demonstrate abnormal splicing (PS3)<br>Absent from population controls (PM2)<br><i>in silico</i> splicing models predict a weakening of the native site (PP3)                                                                                | y | 1  |
| RAD51C c.571+4A>G         | WT                | Deleterious (FP) | VUS | LB | RNA studies demonstrate no abnormal splicing (BS3)<br><i>in silico</i> splicing models predict a weakening of the native site (PP3)                                                                                                                      |   | 18 |
| RAD51D c.144+3G>T         | WT                | Deleterious (FP) | VUS | LB | RNA studies demonstrate no abnormal splicing (BS3)<br><i>in silico</i> splicing models predict a weakening of the native site (PP3)                                                                                                                      |   | 6  |
| RAD51D c.738G>A (p.V246V) | c.668_738del71    | Deleterious (TP) | VUS | LP | RNA studies demonstrate abnormal splicing (PS3)<br>Absent from population controls (PM2)<br><i>in silico</i> splicing models predict a weakening of the native site (PP3)                                                                                | y | 1  |



|                                |                 |                  |     |     |                                                                                                                                                                                                                                                                             |   |     |
|--------------------------------|-----------------|------------------|-----|-----|-----------------------------------------------------------------------------------------------------------------------------------------------------------------------------------------------------------------------------------------------------------------------------|---|-----|
| RAD51D c.145-4_145-3delGCinsTT | WT              | Deleterious (FP) | VUS | LB  | RNA studies demonstrate no abnormal splicing (BS3)<br>Absent from population controls (PM2)<br><i>in silico</i> splicing models predict a weakening of the native site (PP3)                                                                                                |   | 3   |
| CDH1 c.164T>G (p.V55G)         | WT              | Benign (TN)      | VUS | LB  | RNA studies demonstrate no abnormal splicing (BS3)<br>Observed in healthy individuals (BS2)<br>Observed in trans with a pathogenic mutation in an individual without biallelic disease (BP2)<br><i>in silico</i> splicing models predict no effect on the native site (BP4) |   | 38  |
| CDH1 c.387G>T (p.Q129H)        | WT              | Deleterious (FP) | VUS | LB  | RNA studies demonstrate no abnormal splicing (BS3)                                                                                                                                                                                                                          |   | 1   |
| CDH1 c.387+1G>A                | r.229_387del159 | Deleterious (TP) | LP  | VUS | Null variant (PVS1_Moderate)<br>RNA studies demonstrate abnormal splicing (PS3)_supporting<br>Observed in healthy individuals (BS2)_supporting                                                                                                                              | y | 4   |
| CDH1 c.387+5G>A                | WT              | Deleterious (FP) | VUS | LB  | RNA studies demonstrate no abnormal splicing (BS3)<br>Observed in healthy individuals (BS2)<br><i>in silico</i> splicing models predict a weakening of the native site (PP3)                                                                                                |   | 14  |
| CDH1 c.388-4T>C                | WT              | Benign (TN)      | VUS | LB  | RNA studies demonstrate no abnormal splicing (BS3)<br>Observed in healthy individuals (BS2)<br><i>in silico</i> splicing models predict no effect on the native site (BP4)                                                                                                  |   | 5   |
| CDH1 c.558C>T (p.G186G)        | WT              | Deleterious (FP) | VUS | LB  | RNA studies demonstrate no abnormal splicing (BS3)<br>Synonymous change with no predicted splice defect (BP7)<br>Absent from population controls (PM2)<br><i>in silico</i> splicing models predict a weakening of the native site (PP3)                                     |   | 1   |
| CDH1 c.635G>T (p.G212V)        | WT              | Benign (TN)      | VUS | VUS | RNA studies demonstrate no abnormal splicing (BS3)                                                                                                                                                                                                                          |   | n/a |

|                          |                      |                  |     |     |                                                                                                                                                                                                                                                                                                                                                 |   |     |
|--------------------------|----------------------|------------------|-----|-----|-------------------------------------------------------------------------------------------------------------------------------------------------------------------------------------------------------------------------------------------------------------------------------------------------------------------------------------------------|---|-----|
|                          |                      |                  |     |     | <i>in silico</i> splicing models predict no effect on the native site (BP4)<br>Proband counting (PS4_Supporting)<br>Absent from population controls (PM2)                                                                                                                                                                                       |   |     |
| CDH1 c.687+5G>C          | r.903_687del42       | Deleterious (TP) | VUS | VUS | RNA studies demonstrate abnormal splicing (PS3)_supporting<br>Absent from population controls (PM2)<br><i>in silico</i> splicing models predict a weakening of the native site (PP3)                                                                                                                                                            |   | n/a |
| CDH1 c.921A>G (p.Q307Q)  | WT                   | Benign (TN)      | VUS | LB  | RNA studies demonstrate no abnormal splicing (BS3)<br>Observed in healthy individuals (BS2)<br><i>in silico</i> splicing models predict no effect on the native site (BP4)<br>Synonymous change with no predicted splice defect (BP7)<br>Absent from population controls (PM2)                                                                  |   | 4   |
| CDH1 c.1008G>T (p.E336D) | r.1008+1_1008+7 ins7 | Deleterious (TP) | LP  | P   | Null variant (PVS1_Moderate)<br>RNA studies demonstrate abnormal splicing (PS3)<br>Proband counting (PS4_Moderate)<br>Absent from population controls (PM2)<br>Co-segregation with disease (PP1_Moderate)<br><i>in silico</i> splicing models predict a weakening of the native site (PP3)                                                      |   | 2   |
| CDH1 c.1057G>A (p.E353K) | r.1055_1137del83     | Deleterious (TP) | VUS | LP  | RNA studies demonstrate abnormal splicing (PS3)<br>Proband counting (PS4_Moderate)<br>Absent from population controls (PM2)<br><i>in silico</i> splicing models predict a weakening of the native site (PP3)                                                                                                                                    | y | 2   |
| CDH1 c.1137+1delG        | r.1055_1137del83     | Deleterious (TP) | LP  | P   | Null variant (Null variant (PVS1_Strong)<br>RNA studies demonstrate abnormal splicing (PS3)<br>Proband counting (PS4_Supporting)<br>Absent from population controls (PM2)<br><i>in silico</i> splicing models predict a weakening of the native site<br>Known pathogenic variant affecting the same splice site (PP3_Moderate: using c.1137G>A) |   | 7   |

|                               |                   |                  |     |     |                                                                                                                                                                                                                                                             |   |     |
|-------------------------------|-------------------|------------------|-----|-----|-------------------------------------------------------------------------------------------------------------------------------------------------------------------------------------------------------------------------------------------------------------|---|-----|
| CDH1 c.1138-5T>G              | WT                | Deleterious (FN) | VUS | LB  | RNA studies demonstrate no abnormal splicing (BS3)<br>Absent from population controls (PM2)<br><i>in silico</i> splicing models predict a weakening of the native site (PP3)                                                                                |   | 1   |
| CDH1 c.1296C>G (p.N432K)      | WT                | Benign (TN)      | VUS | VUS | RNA studies demonstrate no abnormal splicing (BS3)<br>Observed in healthy individuals (BS2_Supporting)<br><i>in silico</i> splicing models predict no effect on the native site (BP4)                                                                       |   | n/a |
| CDH1 c.1703C>G (p.T568R)      | r.1566_1711del146 | Benign (FN)      | VUS | LP  | RNA studies demonstrate abnormal splicing (PS3)<br>Proband counting (PS4_Supporting)<br>Absent from population controls (PM2)<br><i>in silico</i> splicing models predict no effect on the native site (BP4)                                                | y | 3   |
| CDH1 c.1711+2_1711+7delTAAGGG | r.1566_1711del146 | Deleterious (TP) | LP  | P   | Null variant (Null variant (PVS1_Strong))<br>RNA studies demonstrate abnormal splicing (PS3)<br>Proband counting (PS4_Supporting)<br>Absent from population controls (PM2)<br><i>in silico</i> splicing models predict a weakening of the native site (PP3) |   | 3   |
| CDH1 c.1712-3T>G              | r.1712_1720del9   | Deleterious (TP) | VUS | VUS | RNA studies demonstrate abnormal splicing (PS3_Supporting)<br><i>in silico</i> splicing models predict a weakening of the native site (PP3)                                                                                                                 |   | n/a |
| CDH1 c.1766A>G (p.N589S)      | WT                | Deleterious (FP) | VUS | VUS | Absent from population controls (PM2)<br><i>in silico</i> splicing models predict a weakening of the native site (PP3)<br>RNA studies demonstrate no abnormal splicing (BS3)                                                                                |   | n/a |
| CDH1 c.2439+5_2439+8delGTAA   | r.2388_2439del52  | Deleterious (TP) | VUS | LP  | RNA studies demonstrate abnormal splicing (PS3)<br>Proband counting (PS4_Supporting)<br>Absent from population controls (PM2)<br><i>in silico</i> splicing models predict a weakening of the native site (PP3)                                              | y | 2   |
| CDH1 c.2440-2A>G              | r.2440_2449del10  | Deleterious (TP) | LP  | P   | Null variant (Null variant (PVS1_Strong))<br>RNA studies demonstrate abnormal splicing (PS3)                                                                                                                                                                |   | 1   |

|                            |                                        |                  |     |    |                                                                                                                                                                                                                                             |   |   |
|----------------------------|----------------------------------------|------------------|-----|----|---------------------------------------------------------------------------------------------------------------------------------------------------------------------------------------------------------------------------------------------|---|---|
|                            |                                        |                  |     |    | Absent from population controls (PM2)<br><i>in silico</i> splicing models predict a weakening of the native site (PP3)                                                                                                                      |   |   |
| MLH1 c.116+5G>A            | r.116+1_116+232<br>ins227              | Deleterious (TP) | VUS | LP | RNA studies demonstrate abnormal splicing (PS3)<br>Located in a mutational hotspot (PM1)<br><i>in silico</i> splicing models predict a weakening of the native site (PP3)                                                                   | y | 1 |
| MLH1 c.305A>C<br>(p.E102A) | r.302_306del5                          | Benign (FN)      | VUS | LP | RNA studies demonstrate abnormal splicing (PS3)<br>Absent from population controls (PM2)<br>Clinical phenotype is specific with disease (PP4_Moderate)                                                                                      | y |   |
| MLH1 c.884+3A>G            | r.791_884del94<br>r.791_1038del248     | Deleterious (TP) | VUS | LP | Clinical phenotype is specific with disease (PP4_Strong)<br>RNA studies demonstrate abnormal splicing (PS3)<br>Located in a mutational hotspot (PM1)<br>Absent from population controls (PM2)<br>Co-segregation with disease (PP1_Moderate) | y | 6 |
| MLH1 c.2103+3A>G           | r.1990_2103del114<br>r.1897_2103del207 | Deleterious (TP) | VUS | LP | RNA studies demonstrate abnormal splicing (PS3)<br>Absent from population controls (PM2)<br><i>in silico</i> splicing models predict a weakening of the native site (PP3)<br>Clinical phenotype is specific with disease (PP4_Moderate)     | y | 3 |
| MSH2 c.366+3A>G            | WT                                     | Benign (TN)      | VUS | LB | RNA studies demonstrate no abnormal splicing (BS3)<br><i>in silico</i> splicing models predict no effect on the native site (BP4)                                                                                                           |   | 1 |
| MSH2 c.645+3A>G            | WT                                     | Benign (TN)      | VUS | LB | RNA studies demonstrate no abnormal splicing (BS3)<br><i>in silico</i> splicing models predict no effect on the native site (BP4)                                                                                                           |   | 6 |
| MSH2 c.2006-3T>G           | r.2006_2210del205                      | Deleterious (TP) | VUS | LP | RNA studies demonstrate abnormal splicing (PS3)<br>Clinical phenotype is specific with disease (PP4_Moderate)<br>Absent from population controls (PM2)<br><i>in silico</i> splicing models predict a weakening of the native site (PP3)     | y | 1 |

|                             |                                            |                  |     |    |                                                                                                                                                                                                                                                                            |   |    |
|-----------------------------|--------------------------------------------|------------------|-----|----|----------------------------------------------------------------------------------------------------------------------------------------------------------------------------------------------------------------------------------------------------------------------------|---|----|
| MSH6 c.3231A>G (p.1077P)    | WT                                         | Benign (TN)      | VUS | LB | RNA studies demonstrate no abnormal splicing (BS3)                                                                                                                                                                                                                         |   | 3  |
| MSH6 c.3417C>T (p.G1139G)   | r.3416_3438del22                           | Deleterious (TP) | VUS | LP | RNA studies demonstrate abnormal splicing (PS3)<br>Absent from population controls (PM2)<br>Clinical phenotype is specific with disease (PP4_Moderate)<br><i>in silico</i> splicing models predict a weakening of the native site (PP3)                                    | y | 1  |
| MSH6 c.3801+5G>A            | WT                                         | Deleterious (FP) | VUS | LB | RNA studies demonstrate no abnormal splicing (BS3)<br>Observed in healthy individuals (BS2)                                                                                                                                                                                |   | 33 |
| MSH6 c.3802-7_3802-4delTCTT | r.3802_4001del200                          | Deleterious (TP) | VUS | LP | RNA studies demonstrate abnormal splicing (PS3)<br>Co-segregation with disease (PP1)<br><i>in silico</i> splicing models predict a weakening of the native site (PP3)<br>Clinical phenotype is specific with disease (PP4_Strong)                                          | y | 7  |
| MSH2 c.1277-14C>G           | r.1277-13_1277-1ins13<br>r.1277_1386del110 | Deleterious (TP) | VUS | LP | RNA studies demonstrate abnormal splicing (PS3)<br>Absent from population controls (PM2)<br>Clinical phenotype is specific with disease (PP4_Strong)<br><i>in silico</i> splicing models predict a weakening of the native site (PP3)<br>Co-segregation with disease (PP1) | y | 2  |
| PMS2 c.803+5G>A             | r.762_803del42<br>r.706_803del98           | Deleterious (TP) | VUS | LP | RNA studies demonstrate abnormal splicing (PS3)<br>Absent from population controls (PM2)<br>Clinical phenotype is specific with disease (PP4_Moderate)<br><i>in silico</i> splicing models predict a weakening of the native site (PP3)                                    | y | 4  |

|                 |                 |                  |     |    |                                                                                                                                                                                                                                                                                                               |   |   |
|-----------------|-----------------|------------------|-----|----|---------------------------------------------------------------------------------------------------------------------------------------------------------------------------------------------------------------------------------------------------------------------------------------------------------------|---|---|
| MSH2 c.942+3A>G | r.793_942del150 | Deleterious (TP) | VUS | LP | Novel missense change where a different missense change is pathogenic (PM5)<br>Absent from population controls (PM2)<br>RNA studies demonstrate abnormal splicing (PS3)<br>Clinical phenotype is specific with disease (PP4)<br><i>in silico</i> splicing models predict a weakening of the native site (PP3) | y | 2 |
|-----------------|-----------------|------------------|-----|----|---------------------------------------------------------------------------------------------------------------------------------------------------------------------------------------------------------------------------------------------------------------------------------------------------------------|---|---|
